# Supplementary material for: Nanoparticle Contrast-enhanced T1-Mapping Enables Estimation of Placental Fractional Blood Volume in a Pregnant Mouse Model
Source: PubMed Central journal article supplement (PMC6904754; doi:10.1038/s41598-019-55019-8), 2019-12-10
Supplement: 41598_2019_55019_MOESM1_ESM.pdf [file 41598_2019_55019_MOESM1_ESM.pdf]

## Supplementary Information

# Nanoparticle Contrast-enhanced T1-Mapping Enables Estimation of Placental Fractional Blood Volume in a Pregnant Mouse Model

### Authors and affiliations:

**Andrew A. Badachhape, Ph.D.**, Department of Radiology, Baylor College of Medicine, Houston, TX 77030, USA, badachha@bcm.edu

Laxman Devkota, Ph.D., Department of Pediatrics-Oncology, Baylor College of Medicine, Houston, TX 77030, USA, laxman.devkota@bcm.edu

Igor V. Stupin, Ph.D., The Singleton Department of Pediatric Radiology, Texas Children's Hospital, Houston, TX 77030, USA, ivstupin@texaschildrens.org

Poonam Sarkar, Ph.D., Department of Pediatrics-Oncology, Baylor College of Medicine, Houston, TX 77030, USA, poonam.sarkar@bcm.edu

Mayank Srivastava, Ph.D., The Singleton Department of Pediatric Radiology, Texas Children's Hospital, Houston, TX 77030, USA, mxsrivas@texaschildrens.org

Eric A. Tanifum, Ph.D., The Singleton Department of Pediatric Radiology, Texas Children's Hospital, Houston, TX 77030, USA, eatanifu@texaschildrens.org

Karin A. Fox, M.D., Department of Obstetrics and Gynecology, Texas Children's Hospital, Houston, TX 77030, USA, kafox@bcm.edu

Chandrasekhar Yallampalli, D.V.M., Ph.D., Department of Obstetrics and Gynecology, Texas Children's Hospital, Houston, TX 77030, USA, chandrasekhar.yallampalli@bcm.edu

Ananth V. Annapragada, Ph.D., The Singleton Department of Pediatric Radiology, Texas Children's Hospital, Houston, TX 77030, USA, avannapr@texaschildrens.org

\*Ketan B. Ghaghada, Ph.D., The Singleton Department of Pediatric Radiology, Texas Children's Hospital, Houston, TX 77030, USA, kbghagha@texaschildrens.org

### **\*Corresponding Author:**

Ketan B. Ghaghada, Ph.D.  
The Singleton Department of Pediatric Radiology, Texas Children's Hospital  
1102 Bates Street, Suite 850  
Houston, TX 77030  
Email: kbghagha@texaschildrens.org  
Phone: 832-824-0865

## 1 Supplementary Information

2

|       | FBV p-values (CE-MRI) |       |       |
|-------|-----------------------|-------|-------|
|       | E14.5                 | E16.5 | E18.5 |
| E14.5 | -                     | 0.022 | 0.002 |
| E16.5 | 0.022                 | -     | 0.43  |
| E18.5 | 0.002                 | 0.43  | -     |

3

4 **Supplementary Table S1:** Wilcoxon rank sum test p-values comparing mean placental fractional  
5 blood volume (FBV) estimates from contrast-enhanced MRI (CE-MRI) at each gestational  
6 timepoint. CE-MRI derived estimates of FBV are significantly different at E16.5 and E18.5 relative  
7 to E14.5.

8

|       | FBV p-values (CE-CT) |       |       |
|-------|----------------------|-------|-------|
|       | E14.5                | E16.5 | E18.5 |
| E14.5 | -                    | 0.532 | 0.028 |
| E16.5 | 0.532                | -     | 0.018 |
| E18.5 | 0.028                | 0.018 | -     |

9

10 **Supplementary Table S2:** Wilcoxon rank sum test p-values comparing mean placental fractional  
11 blood volume (FBV) estimates from contrast-enhanced computed tomography (CE-CT) at each  
12 gestational timepoint. CE-CT derived estimates of FBV are significantly different at E18.5 relative  
13 to E16.5 and E14.5.
